# Supplementary material for: MicroRNA-218 inhibits tumor angiogenesis of human renal cell carcinoma by targeting GAB2
Source: PubMed Central journal article supplement — Oncol Rep. 2020 Sep 8;44(5):1961–70. doi: 10.3892/or.2020.7759 (PMC7551166; doi:10.3892/or.2020.7759), 2020-09-08
Supplement: Supplementary_Data.pdf [file Supplementary_Data.pdf]

Figure S1. Overall survival of patients with miR-218 high expression and low expression. The data were downloaded from the TCGA database.

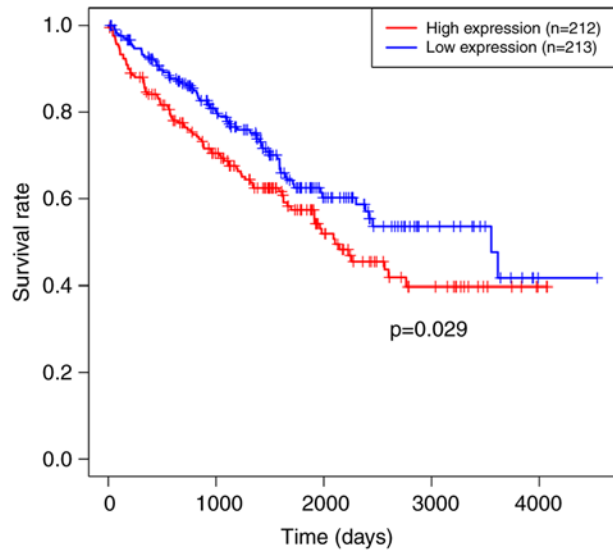

Figure S2. The expression levels of EMT-related markers E-cadherin and vimentin were analyzed by mRNA real-time PCR in miR-218-overexpressing ACHN cells (left) and GAB2-knockdown ACHN cells (right). EMT, epithelial-mesenchymal transition; GAB2, GRB2-associated binding protein 2. The values are presented as mean  $\pm$  standard deviation (SD). \* $P < 0.05$ .

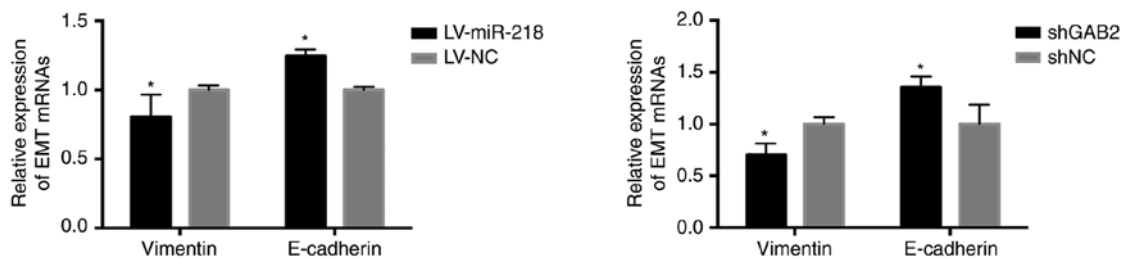

Figure S3. Protein levels of total AKT and mTOR in miR-218-overexpressing RCC cells (left), and GAB2-knockdown RCC cells (right) by western blot analysis. GAPDH was used as an internal control. GAB2, GRB2-associated binding protein 2; RCC, renal cell carcinoma; mTOR, mammalian target of rapamycin.

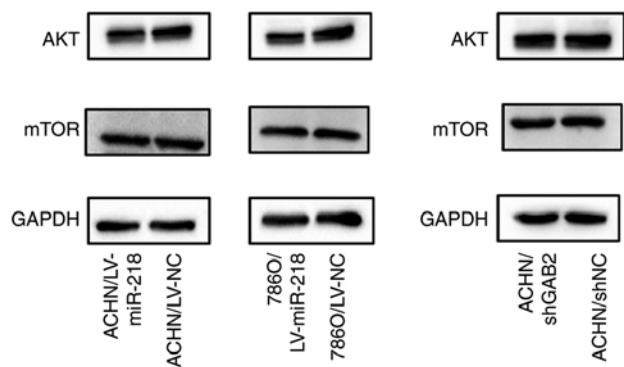

Figure S4. The tumor volumes of subcutaneous xenografts four weeks after inoculation.

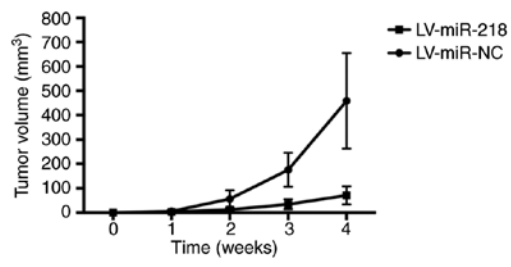

Table SI. Primers used for PCR.

| Gene                                     | Forward                       | Reverse               |
|------------------------------------------|-------------------------------|-----------------------|
| hsa-miR-218                              | ACACTCCAGCTGGGTTGTGCTTGATCTAA | TGGTGTTCGTGGAGTCG     |
| U6                                       | CTCGCTTCGGCAGCACA             | AACGCTTCACGAATTTGCGT  |
| VEGFA                                    | GAGCCTTGCCTTGCTGCTCT          | CACCAGGGTCTCGATTGGATG |
| GAB2                                     | CCCTGTGTCAAACCACATGC          | CTGCTCTTCGGCTTATGCACT |
| GAPDH                                    | ATGGGGAAGGTGAAGGTCGG          | GACGGTGCCATGGAATTTGC  |
| E-cadherin                               | CGAGAGCTACACGTTACGG           | GGGTGTCGAGGGAAAAATAGG |
| Vimentin                                 |                               | CTTTGTCGTTGGTTAGCTGGT |
| GAB2, GRB2-associated binding protein 2. |                               |                       |

Table SII. Correlation between miR-218 and the clinical pathological characteristics of the RCC samples.

| Characteristics | Variables            | miR-218 expression level |         | P-value                 |
|-----------------|----------------------|--------------------------|---------|-------------------------|
|                 |                      | High (n)                 | Low (n) |                         |
| Sex             | Male                 | 133                      | 152     | 0.07369                 |
|                 | Female               | 79                       | 61      |                         |
| Age (years)     | ≥60                  | 103                      | 126     | 0.03677                 |
|                 | <60                  | 109                      | 87      |                         |
| T               | T1+T2                | 115                      | 138     | 2.489x10 <sup>-10</sup> |
|                 | T3+T4                | 97                       | 75      |                         |
| N               | N0                   | 100                      | 93      | 0.9136                  |
|                 | N1                   | 6                        | 7       |                         |
|                 | Nx                   | 106                      | 113     |                         |
| M               | M0                   | 169                      | 117     | 0.3191                  |
|                 | M1                   | 42                       | 33      |                         |
|                 | Mx                   | 1                        | 3       |                         |
| Grade           | G1 + G2              | 87                       | 92      | 0.01906                 |
|                 | G3 + G4              | 124                      | 119     |                         |
|                 | Gx + not available   | 1                        | 2       |                         |
| Stage           | Stage I + Stage II   | 108                      | 130     | 0.05173                 |
|                 | Stage III + Stage IV | 103                      | 83      |                         |
|                 | Not available        | 1                        | 0       |                         |

RCC, renal cell carcinoma.
